# Supplementary material
Source: PubMed Central journal article supplement (PMC2719252)
Supplement: NIHMS118223-supplement-Supp_Data.pdf [file NIHMS118223-supplement-Supp_Data.pdf]

SUPPLEMENTARY MATERIAL

**Table S1. Bacterial strains and plasmids used in this study**

| Strain or Plasmid    | Genotype or description                                                                                                               | Reference |
|----------------------|---------------------------------------------------------------------------------------------------------------------------------------|-----------|
| <b>Strains</b>       |                                                                                                                                       |           |
| E2348/69             | wild type O127:H6 EPEC strain, produces $\alpha_1$ bundlin                                                                            | (3)       |
| UMD901               | E2348/69 <i>bfpA</i> C129S: does not make BFP                                                                                         | (23)      |
| O119:H6              | wild type EPEC strain, produces $\alpha_3$ bundlin                                                                                    |           |
| BL21(AI) <i>slyD</i> | F <sup>-</sup> <i>ompT hsdS<sub>B</sub> (r<sub>B</sub><sup>-</sup> m<sub>B</sub><sup>-</sup>) gal dcm araB::T7RNAP-tetA slyD::cat</i> | (15)      |
| <b>Plasmids</b>      |                                                                                                                                       |           |
| pRPA100              | $\alpha_1$ <i>bfpA</i> under control of PerA, Amp <sup>r</sup>                                                                        | (1)       |
| pXLW15               | $\beta_6$ <i>bfpA</i> under control of PerA, Amp <sup>r</sup>                                                                         | (8)       |
| pXLW16               | $\beta_2$ <i>bfpA</i> under control of PerA, Amp <sup>r</sup>                                                                         | (8)       |
| pXLW17               | $\beta_3$ <i>bfpA</i> under control of PerA, Amp <sup>r</sup>                                                                         | (8)       |
| pPF401               | Expression vector for soluble $\alpha_1$ bundlin under control of T7 promoter, Kan <sup>r</sup>                                       | (15)      |
| pPF402               | Expression vector for soluble $\beta_6$ bundlin under control of T7 promoter, Kan <sup>r</sup>                                        | (8)       |
| pRMH1                | pRPA100 137GENNI → SPDST                                                                                                              |           |
| pRMH2                | pRPA100 149 DQA → TSTN                                                                                                                |           |
| pRMH3                | pRPA100 S58N, D61N, T63N                                                                                                              |           |
| pRMH4                | pRPA100 N97A and A101N                                                                                                                |           |
| pRMH5                | pRPA100 Y75A                                                                                                                          |           |
| pRMH6                | pRPA100 Y75S                                                                                                                          |           |
| pRMH7                | pRPA100 Y75T                                                                                                                          |           |
| pRMH8                | pRPA100 Y75F                                                                                                                          |           |
| pRMH9                | pRPA100 G137S                                                                                                                         |           |
| pRMH10               | pRPA100 I141T                                                                                                                         |           |
| pRMH11               | pXLW16 TPAST → GENNI                                                                                                                  |           |
| pRMH12               | pXLW17 TPAST → GENNI                                                                                                                  |           |
| pRMH13               | pXLW15 SPDST → GENNI                                                                                                                  |           |
| pRMH1exp             | pPF401 137GENNI → SPDST                                                                                                               |           |

SUPPLEMENTARY MATERIAL

**Table S2. Sense oligonucleotide primers used to introduce mutations in *bfpA*.**

| <b>Mutations Introduced</b>          | <b>Primer Name</b> | <b>Primer Sequence (mutated codons in bold)</b>                         |
|--------------------------------------|--------------------|-------------------------------------------------------------------------|
| G137S, E138P, N139D,<br>N140S, I141T | RMH1               | 5' gttaatatcctct <b>agcccagatagc</b> actacatcatttggtaat                 |
| D149T, Q150S, A151T,<br>Insert N152  | RMH2               | 5' ggtaatagcgt <b>acttcgggtaac</b> gctaaatcgact                         |
| S58N, D61N, T63N                     | RMH3               | 5' accagttata <b>aat</b> ggatt <b>gaact</b> caa <b>aac</b> attttacttaac |
| N97A, A101N                          | RMH4               | 5' ccagcag <b>cca</b> ataacac <b>ctc</b> atttggttactat                  |
| Y75A                                 | RMH5               | 5' gcaattccggataat <b>gcc</b> aaagatacaaca <b>aac</b>                   |
| Y75F                                 | RMH6               | 5' gcaattccggataat <b>ttc</b> aaagatacaaca <b>aac</b>                   |
| Y75S                                 | RMH7               | 5' gcaattccggataat <b>tcc</b> aaagatacaaca <b>aac</b>                   |
| Y75T                                 | RMH8               | 5' gcaattccggataat <b>acca</b> aaagatacaaca <b>aac</b>                  |
| G137S                                | RMH9               | 5' gttaatatcctct <b>agcccagatagc</b> attacatcatttggtaat                 |
| I141T                                | RMH10              | 5' gttaatatcctctggcccagatag <b>ca</b> ctacatcatttggtaat                 |
| SPDST → GENNI                        | RMH11              | 5' tacggtgtaatatcagtg <b>ggcgaaaataatatt</b><br>acttcatttaacttcagcc     |
